# Supplementary material for: Improved Operation of Chloralkaline Reversible Cells with Mixed Metal Oxide Electrodes Made Using Microwaves
Source: MDPI journal article supplement (doi:10.3390/nano14080693), 2024-04-17
Supplement: s1 [file s1]

# Improved Operation of Chloralkaline Reversible Cells with Mixed Metal Oxide Electrodes Made Using Microwaves

Jamylle Y. C. Ribeiro <sup>1,2,3</sup>, Gessica O. S. Santos <sup>3,4</sup>, Aline R. Dória <sup>1,4</sup>, Iñaki Requena <sup>3</sup>, Marcos R. V. Lanza <sup>4</sup>, Giancarlo R. Salazar-Banda <sup>1,2</sup>, Katlin I. B. Eguiluz <sup>1,2</sup>, Justo Lobato <sup>3,\*</sup> and Manuel A. Rodrigo <sup>3,\*</sup>

<sup>1</sup> Electrochemistry and Nanotechnology Laboratory, Institute of Technology and Research (ITP), Aracaju 49032-490, SE, Brazil; jamyllerib@gmail.com (J.Y.C.R.); alinerdoria@gmail.com (A.R.D.); gianrsb@gmail.com (G.R.S.-B.); katlinbarrios@gmail.com (K.I.B.E.)

<sup>2</sup> Graduate Program in Processes Engineering (PEP), Tiradentes University, Aracaju 49032-490, SE, Brazil

<sup>3</sup> Chemical Engineering Department, Faculty of Chemical Sciences and Technologies, Universidad Castilla-La Mancha, 13004 Ciudad Real, Spain; gessicasantiago@usp.br (G.O.S.S.); inaki.requena@uclm.es (I.R.)

<sup>4</sup> São Carlos Institute of Chemistry, University of São Paulo, São Carlos 13566-590, SP, Brazil; marcoslanza@usp.br

\* Correspondence: justo.lobato@uclm.es (J.L.); manuel.rodrigo@uclm.es (M.A.R.)

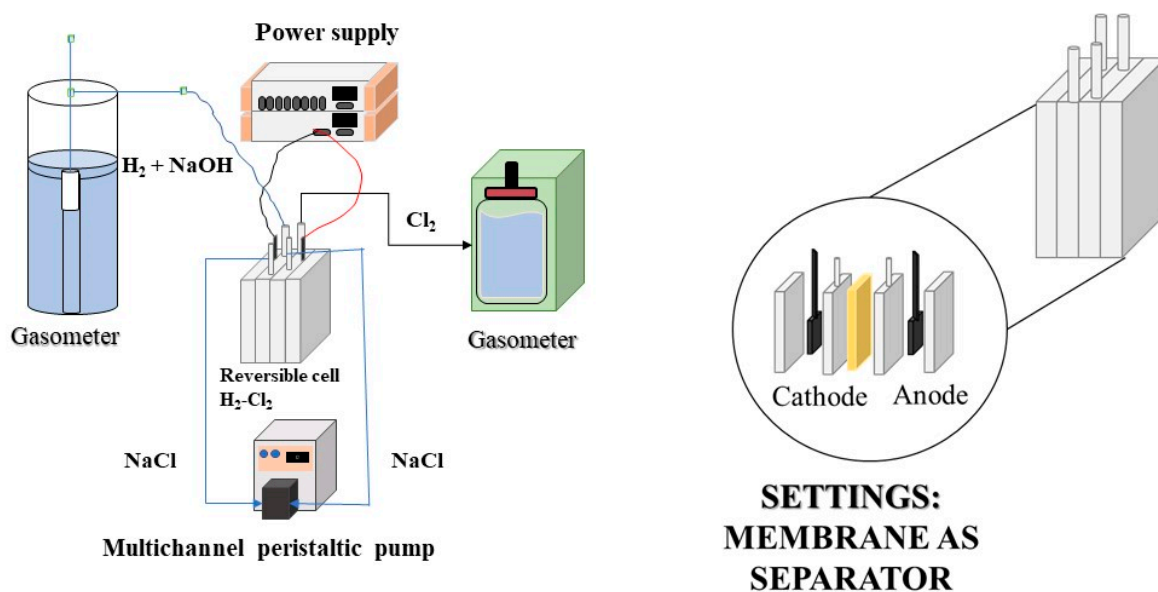

**Figure S1.** Schematic representation of the experimental setup used in this study, featuring gasometers in the anode and cathode compartments, power supply, electrochemical reversible cell, and a multichannel peristaltic pump. The right image provides an enlarged view of the reactor.

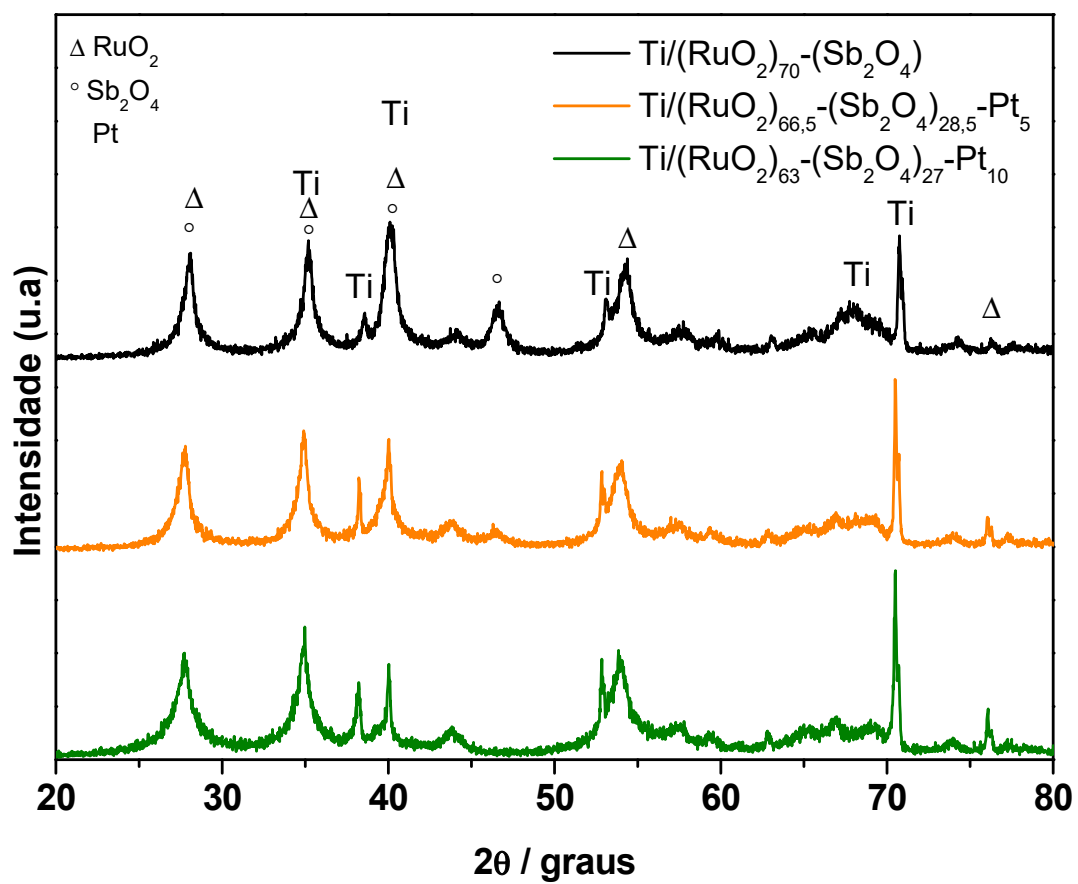

**Figure S2.** XRD diffraction patterns of the  $\text{Ti}/(\text{RuO}_2)_{70}-(\text{Sb}_2\text{O}_4)_{30}$ ,  $\text{Ti}/(\text{RuO}_2)_{66.5}-(\text{Sb}_2\text{O}_4)_{28.5}-\text{Pt}_5$ , and  $\text{Ti}/(\text{RuO}_2)_{63}-(\text{Sb}_2\text{O}_4)_{27}-\text{Pt}_{10}$  electrodes.

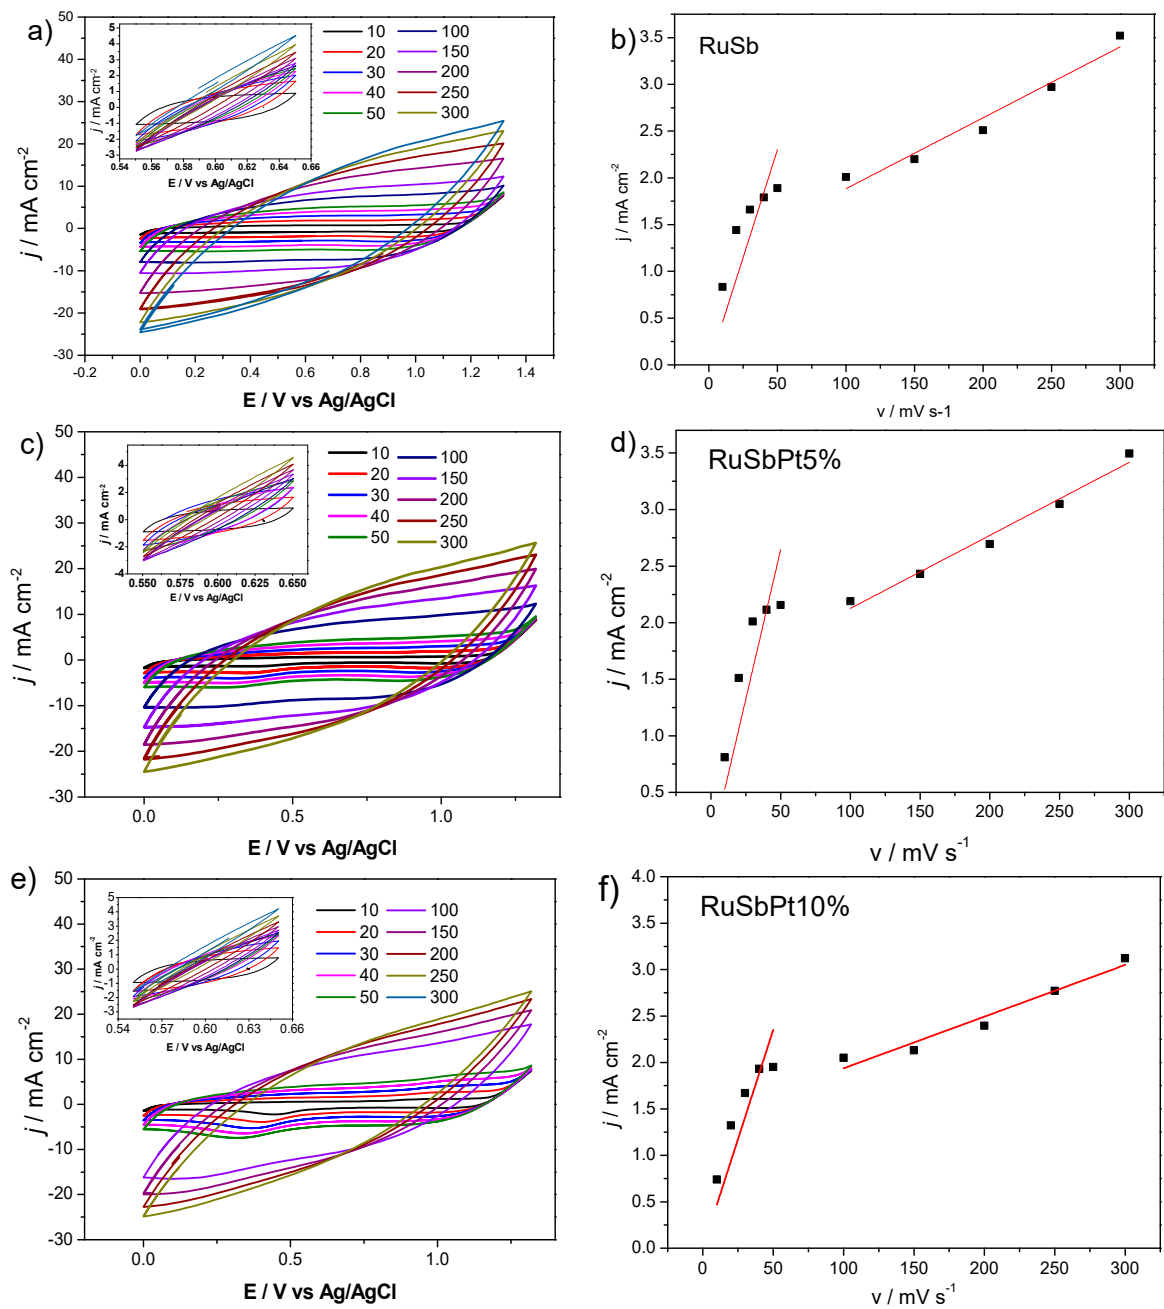

**Figure S3.** Cyclic voltammograms recorded in a 0.5 M H<sub>2</sub>SO<sub>4</sub> solution during repetitive potential cycles at a scan rate ranging from 10 to 300 mV s<sup>-1</sup> (a,c,e). The correlation between the voltammetric capacitive responses is shown in (b,d,f) for the electrodes (a,b) Ti/(RuO<sub>2</sub>)<sub>70</sub>-(Sb<sub>2</sub>O<sub>4</sub>)<sub>30</sub>, (c,d) Ti/(RuO<sub>2</sub>)<sub>66.5</sub>-(Sb<sub>2</sub>O<sub>4</sub>)<sub>28.5</sub>-Pt<sub>5</sub>, and (e,f) Ti/(RuO<sub>2</sub>)<sub>63</sub>-(Sb<sub>2</sub>O<sub>4</sub>)<sub>27</sub>-Pt<sub>10</sub>.

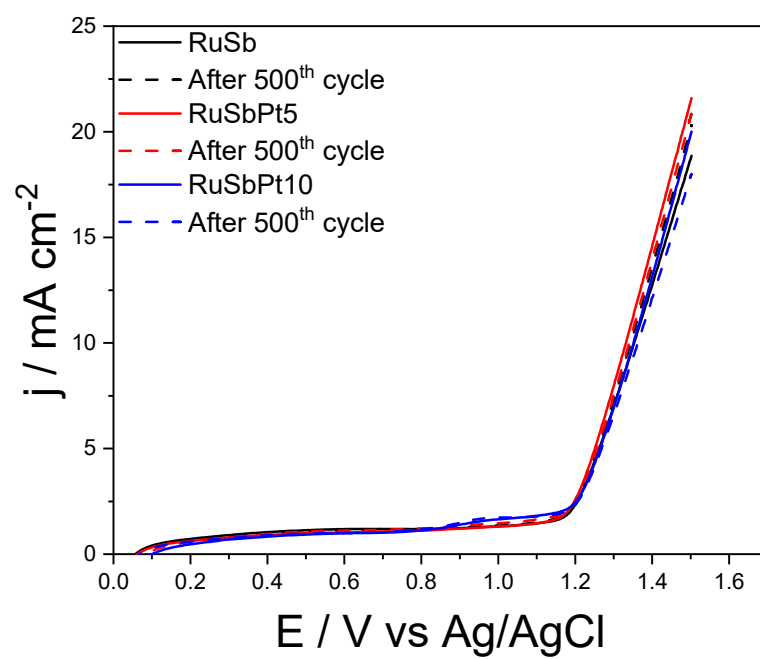

**Figure S4.** Linear sweep voltammetry profiles recorded at a scan rate of  $20 \text{ mV s}^{-1}$  in a  $0.5 \text{ M H}_2\text{SO}_4$  solution before cycling and after 500 cycles at different electrodes studied in this work.
